# Supplementary material for: Synthesis and strong photooxidation power of a supramolecular hybrid comprising a polyoxometalate and Ru(ii) polypyridyl complex with zinc(ii)
Source: Royal Society of Chemistry journal article supplement (doi:10.1039/c5fd00080g), 2015-01-01
Supplement: c5fd00080g1.pdf [file c5fd00080g1.pdf]

# **Synthesis and Strong Photooxidation Power of a Supramolecular Hybrid comprising a Polyoxometalate and Ru(II) Polypyridyl Complex with Zinc(II)**

Kenji Ohashi,<sup>a</sup> Hiroyuki Takeda,<sup>a</sup> Kazuhide Koike,<sup>b</sup> and Osamu Ishitani\*<sup>a</sup>

<sup>a</sup> *Department of Chemistry, Graduate School of Science and Engineering, Tokyo Institute of Technology, Ookayama 2-12-1-NE-1, Meguro-ku, Tokyo, 152-8551, Japan.  
E-mail: iishitani@chem.titech.ac.jp*

<sup>b</sup> *National Institute of Advanced Industrial Science and Technology, Onogawa 16-1, Tsukuba, 305-8569, Japan.*

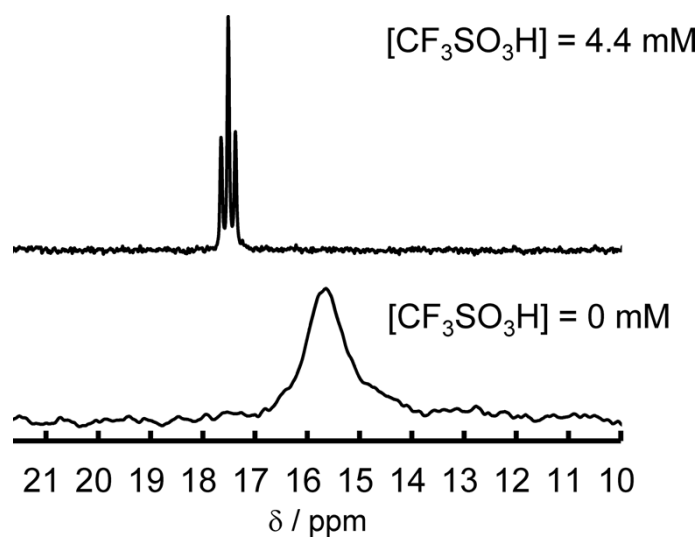

**Fig. S1**  $^{31}\text{P}$  NMR spectra in  $\text{dms}\text{-d}_6$  of **RuP** (4.4 mM) in the absence and presence of trifluoromethanesulfonic acid (160 MHz).

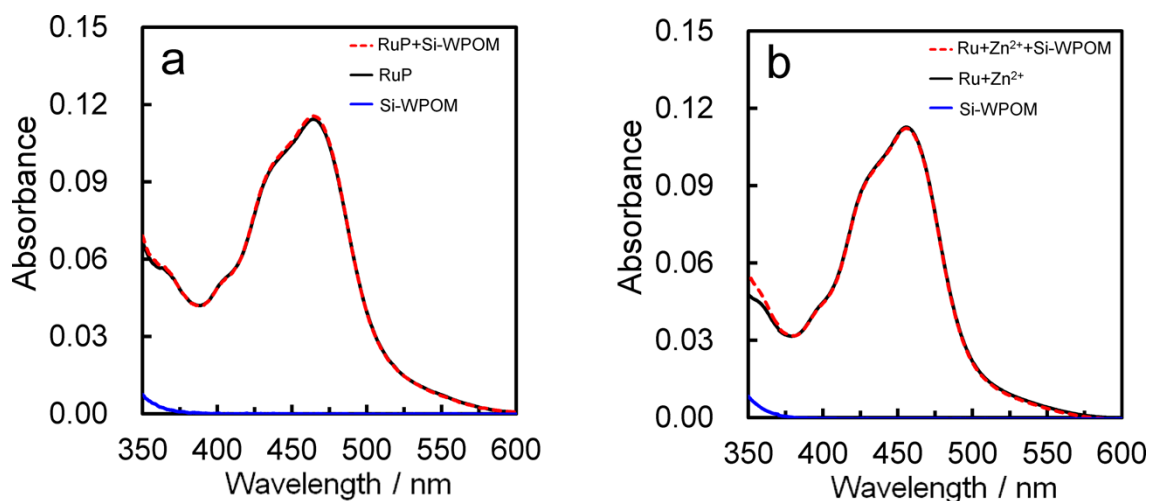

**Fig. S2** UV-Vis absorption spectra of DMSO solutions containing (a) **RuP** (7  $\mu\text{M}$ ) plus **Si-WPOM** (3.5  $\mu\text{M}$ ), **RuP** (7  $\mu\text{M}$ ) and **Si-WPOM**; (b) **Ru** (7  $\mu\text{M}$ ) plus **Zn $^{2+}$**  (3.5  $\mu\text{M}$ ) plus **Si-WPOM** (3.5  $\mu\text{M}$ ), **Ru** (7  $\mu\text{M}$ ) plus **Zn $^{2+}$**  (3.5  $\mu\text{M}$ ) and **Si-WPOM** (7  $\mu\text{M}$ ).

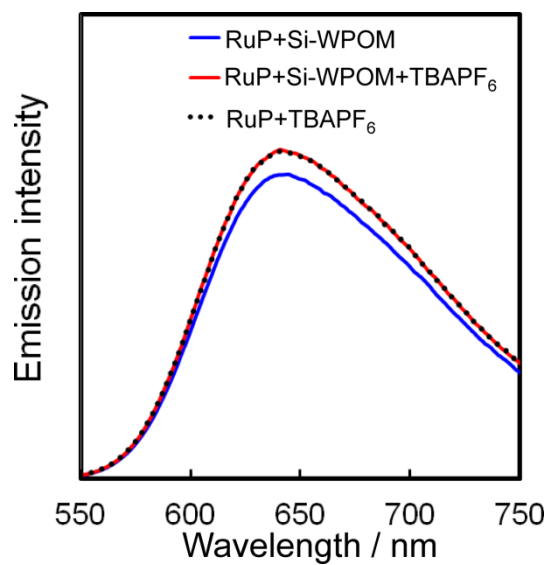

**Fig. S3** Emission spectra from DMSO solutions containing **RuP** ( $7 \mu\text{M}$ ) and **Si-WPOM** ( $7 \mu\text{M}$ ) in the absence and presence of  $\text{TBAPF}_6$  (10 mM) and **RuP** ( $7 \mu\text{M}$ ) and  $\text{TBAPF}_6$  (10 mM) obtained at  $25^\circ\text{C}$  under Ar with  $\lambda_{\text{ex}} = 510 \text{ nm}$ . The emission intensities were normalized with the absorbance at the excitation wavelength.

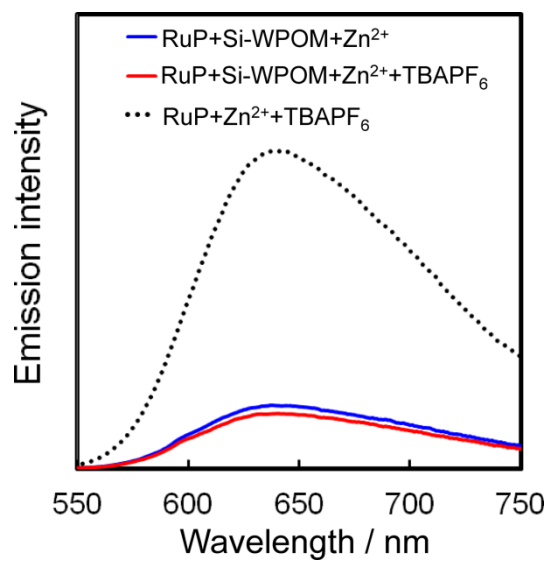

**Fig. S4** Emission spectra from DMSO solutions containing **RuP** ( $7 \mu\text{M}$ ),  $\text{Zn}^{2+}$  ( $3.5 \mu\text{M}$ ) and **Si-WPOM** ( $7 \mu\text{M}$ ) in the absence and presence of  $\text{TBAPF}_6$  ( $10 \text{ mM}$ ) and Ru ( $7 \mu\text{M}$ ),  $\text{Zn}^{2+}$  ( $3.5 \mu\text{M}$ ) and  $\text{TBAPF}_6$  ( $10 \text{ mM}$ ) obtained at  $25^\circ\text{C}$  under Ar with  $\lambda_{\text{ex}} = 510 \text{ nm}$ . The emission intensities were normalized with the absorbance at the excitation wavelength.

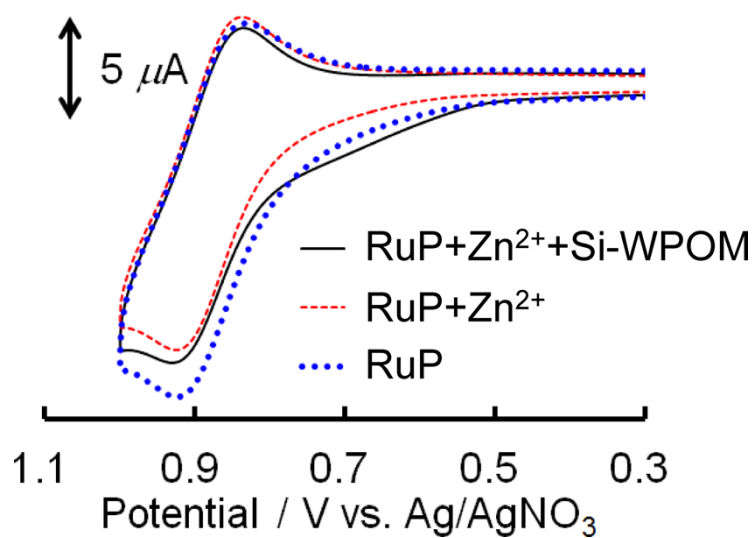

**Fig. S5** Cyclic voltammograms of **RuP** (0.5 mM),  $\text{Zn}^{2+}$  (0.025 mM) and **Si-WPOM** (0.25 mM); **RuP** (0.5 mM) and  $\text{Zn}^{2+}$  (0.025 mM); and **RuP** (0.5 mM) obtained in DMSO solutions containing  $\text{TBAPF}_6$  (0.1 mol  $\text{dm}^{-3}$ ) using a glassy carbon working electrode, a Pt counter electrode and a  $\text{Ag}/\text{AgNO}_3$  (0.01 mol  $\text{dm}^{-3}$ ) reference electrode. The scan rate was 200  $\text{mV s}^{-1}$ .

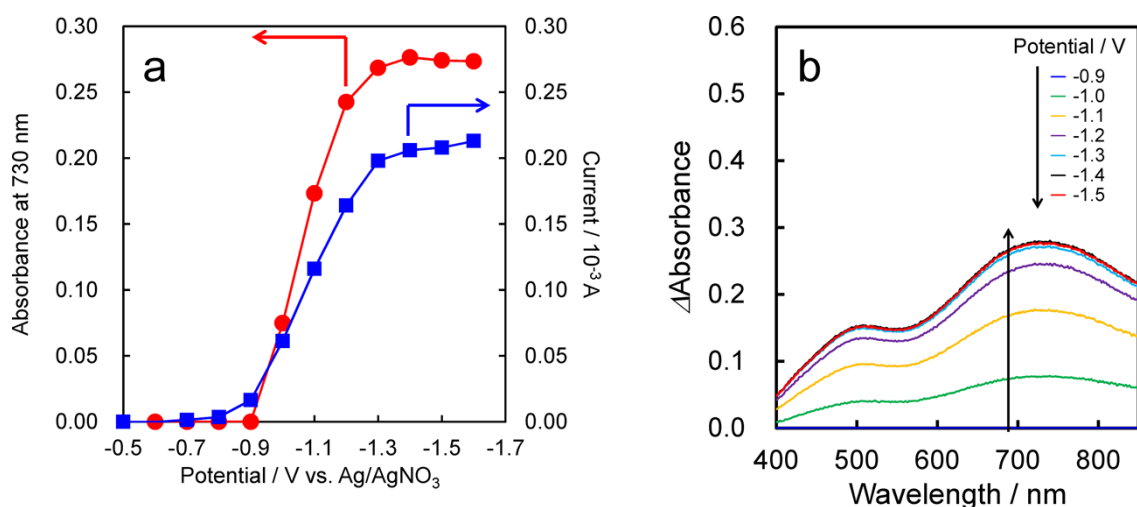

**Fig. S6** Absorbance at 730 nm (red line) and the current (blue line) during flow electrolysis of a DMSO solution containing **Si-WPOM** (1.5 mM) and tetrabutylammonium hexafluorophosphate (0.1 M) using a carbon felt working electrode (surface area = 1900 cm<sup>-2</sup>) in a Vycor glass separator, a Ag/AgNO<sub>3</sub> (0.01 M) reference electrode and a Pt counter electrode located outside the separator (VF-2 flow electrolysis cell, EC-FRONTIER Inc.). The flow rate of the solution was 0.11 mL min<sup>-1</sup>, and the optical pass length was 1.5 mm. The number of electrons accepted by one molecule of **Si-WPOM** was calculated using Eq. S1:

$$N = \frac{i}{CFv} \text{ (S1)}$$

where  $i$  is the current (A),  $C$  is the **Si-WPOM** concentration (1.0 mM),  $F$  is the Faraday constant, and  $v$  is the flow rate (0.11 mL min<sup>-1</sup>). The value of  $N = 1.3$  was obtained at the applied voltage of -1.4 V.

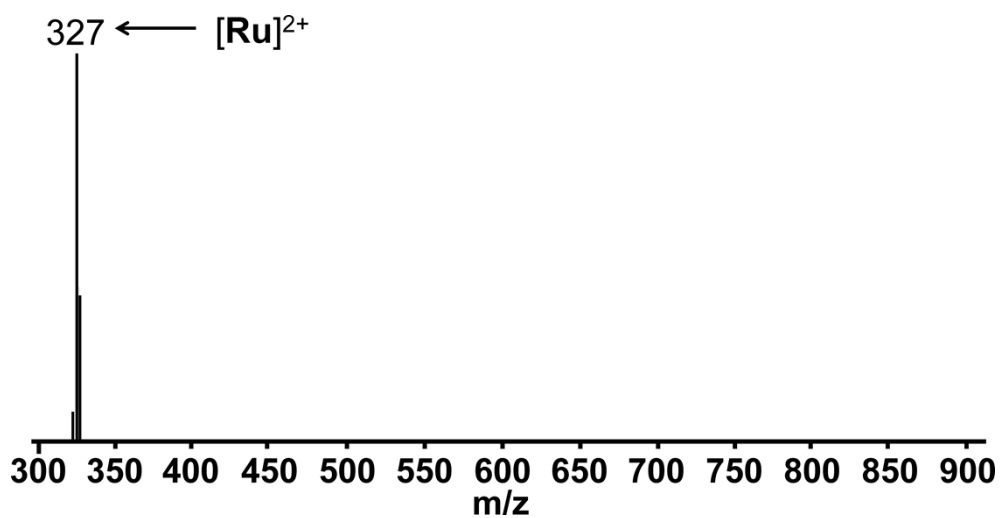

**Fig. S7** ESI-MS spectra (eluent; CH<sub>3</sub>CN) of **Ru** (4.4 mM) and Zn<sup>2+</sup> (2.2 mM).

Analyzed samples were dissolved in DMSO.

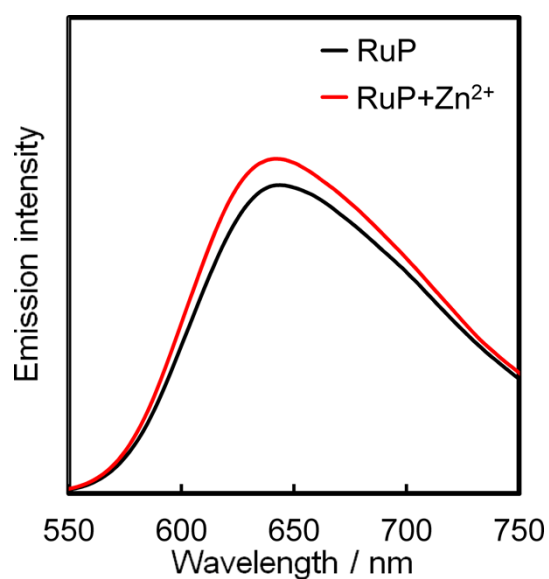

**Fig. S8** Emission spectra of DMSO solutions of **RuP** (7  $\mu$ M) in the absence and presence of Zn<sup>2+</sup> (3.5  $\mu$ M) obtained at 25°C in DMSO under Ar. The excitation wavelength was 510 nm, and the emission intensities were normalized to the absorbance at the excitation wavelength.

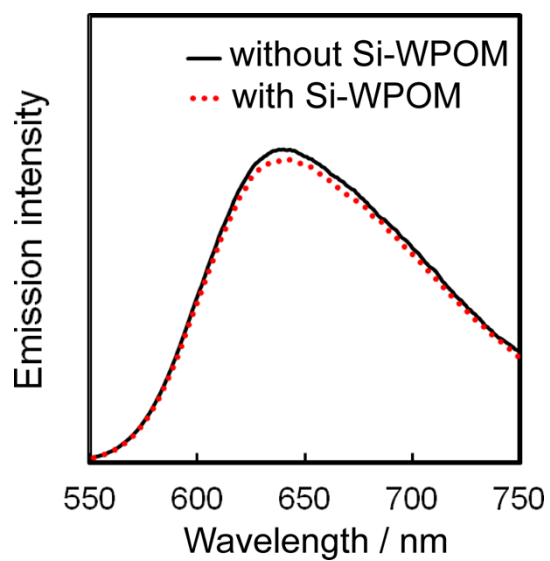

**Fig. S9** Emission spectra of DMSO solutions containing TBAPF<sub>6</sub> (100 mM), **RuP** (7 μM) and Zn<sup>2+</sup> (7 μM) obtained in the presence and absence of **Si-WPOM** (7 μM) at 25°C under Ar. The excitation wavelength was 510 nm. The emission intensities were normalized to the absorbance at the excitation wavelength.



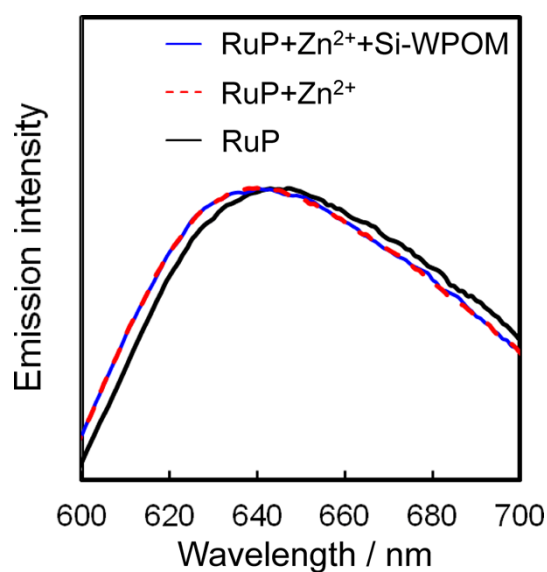

**Fig. S10** Emission spectra of DMSO solutions of TBAPF<sub>6</sub> (100 mM) containing **RuP** (7  $\mu$ M), Zn<sup>2+</sup> (7  $\mu$ M) and **Si-WPOM** (7  $\mu$ M); **RuP** (7  $\mu$ M) and Zn<sup>2+</sup> (3.5  $\mu$ M); and **RuP** (7  $\mu$ M) obtained at 25°C under Ar. The excitation wavelength was 510 nm. The emission intensities were normalized at their peaks.

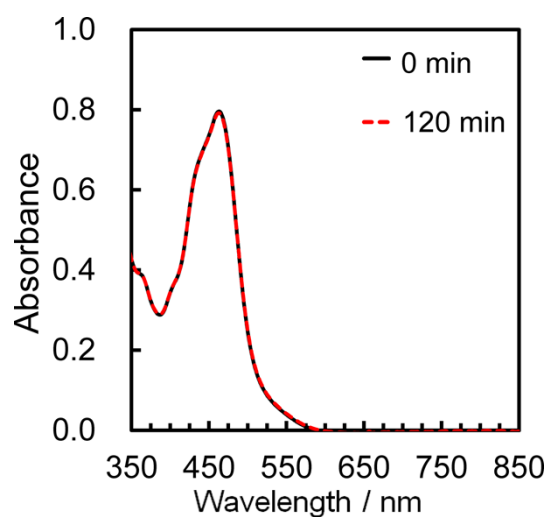

**Fig. S11** Steady-state analysis of the absorption spectrum before and after irradiation for 120 min ( $\lambda_{\text{ex}} = 480$  nm) in an Ar-saturated DMSO solution containing **RuP** (0.05 mM), Zn<sup>2+</sup> (0.025 mM) and DEOA (2 M).
